# Supplementary material for: Assembly of infectious Kaposi’s sarcoma-associated herpesvirus progeny requires formation of a pORF19 pentamer
Source: PubMed Central journal article supplement (PMC8568140; doi:10.1371/journal.pbio.3001423), 2021-11-04

Blot Fig. 5A, left panel,  $\alpha$ -pORF26

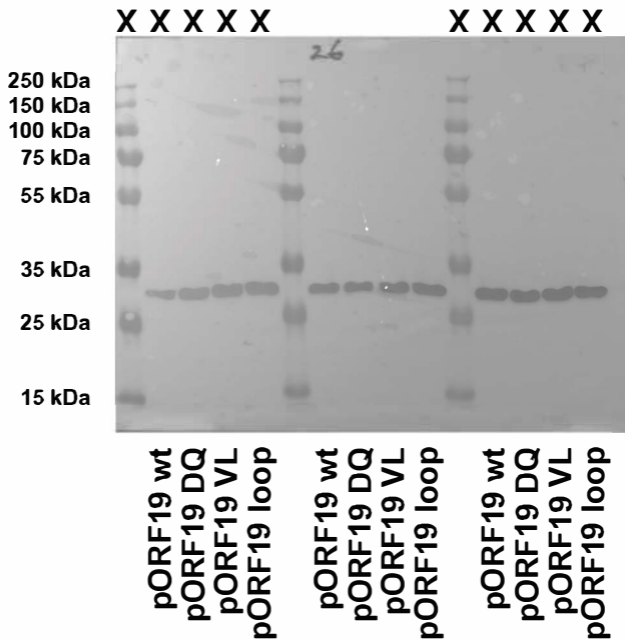

Blot Fig. 5A, middle panel,  $\alpha$ -V5 (pORF25)

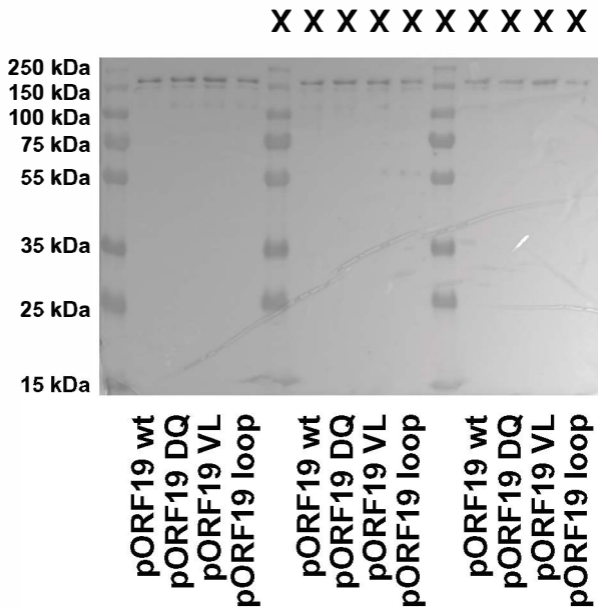

Blot Fig. 5A, right panel,  $\alpha$ -GFP (pORF19)

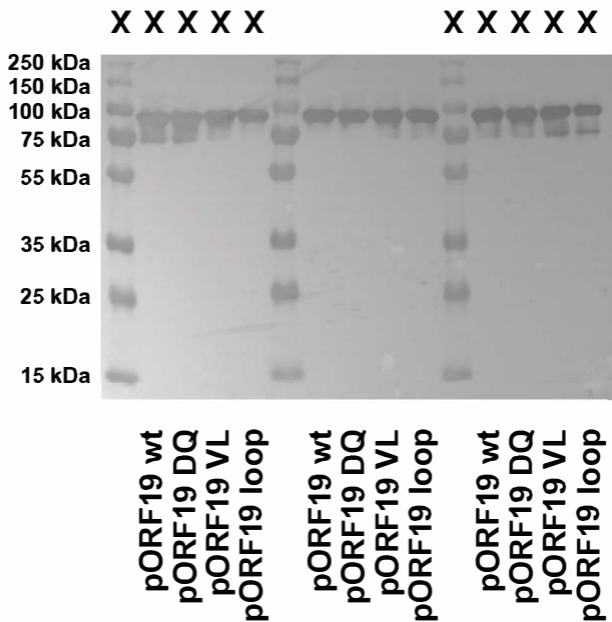

Blot Fig. 6A, top / bottom panel,  $\alpha$ -LANA /  $\alpha$ - $\beta$ -Actin

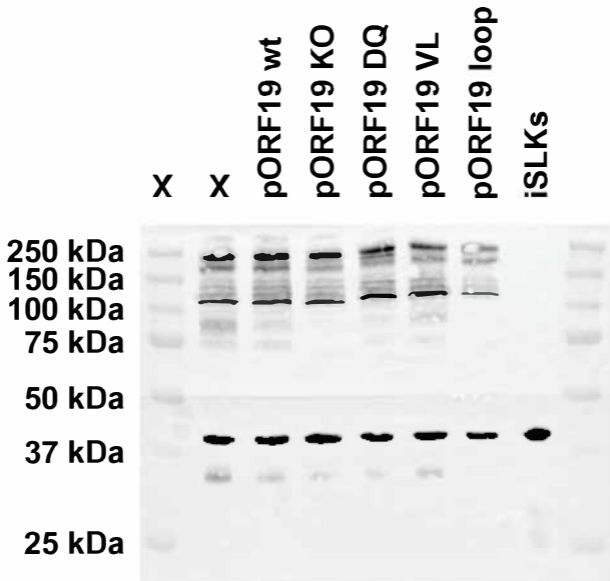

Blot Fig. 6A, middle panels,  $\alpha$ -pORF45 /  $\alpha$ -K-bZIP

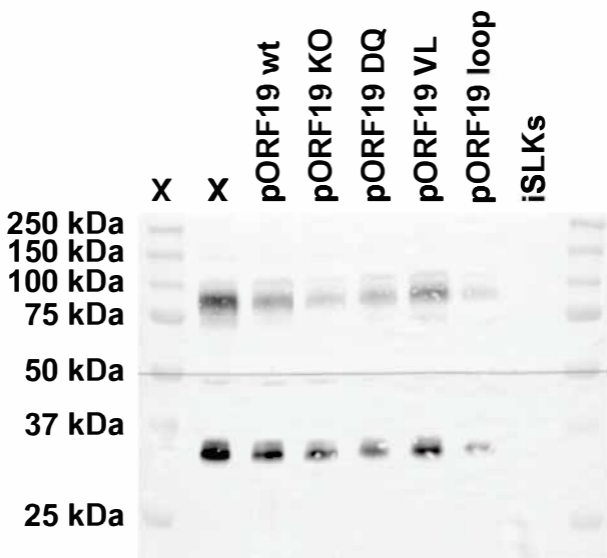

Blot Fig. 6C, top panel,  $\alpha$ -gH

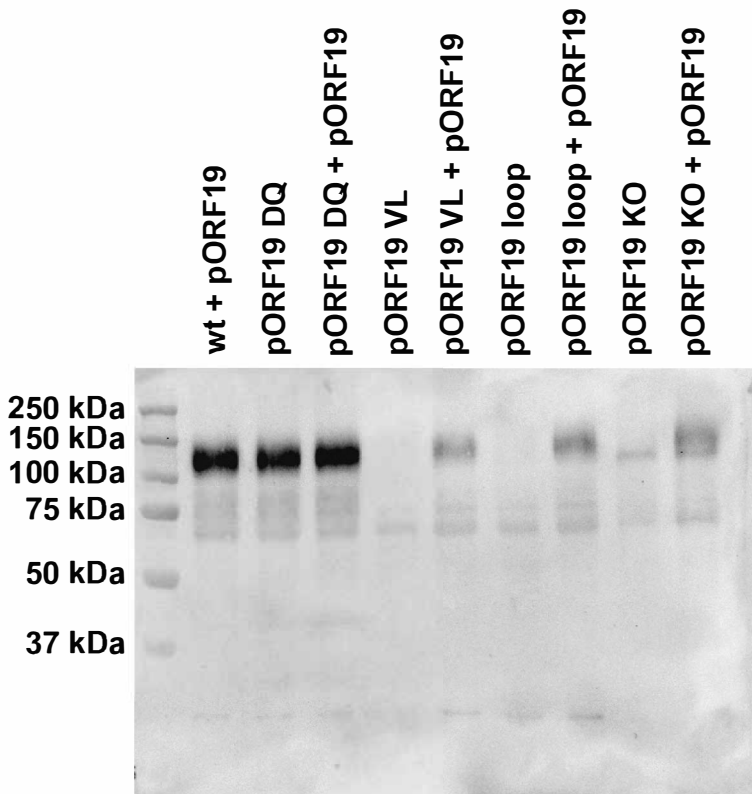

Blot Fig. 6C, middle panel,  $\alpha$ -pORF45

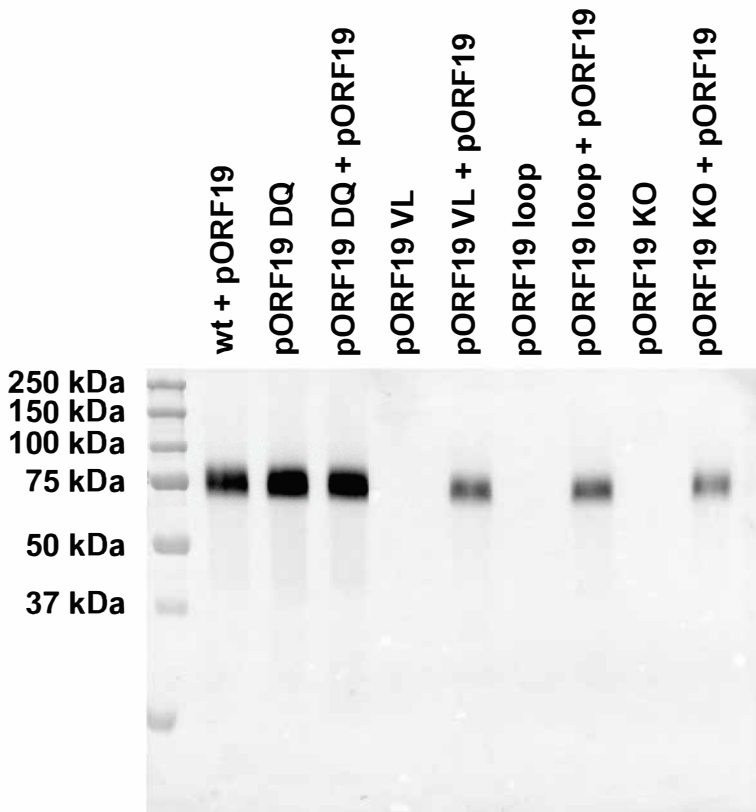

Blot Fig. 6C, bottom panel,  $\alpha$ -pORF26

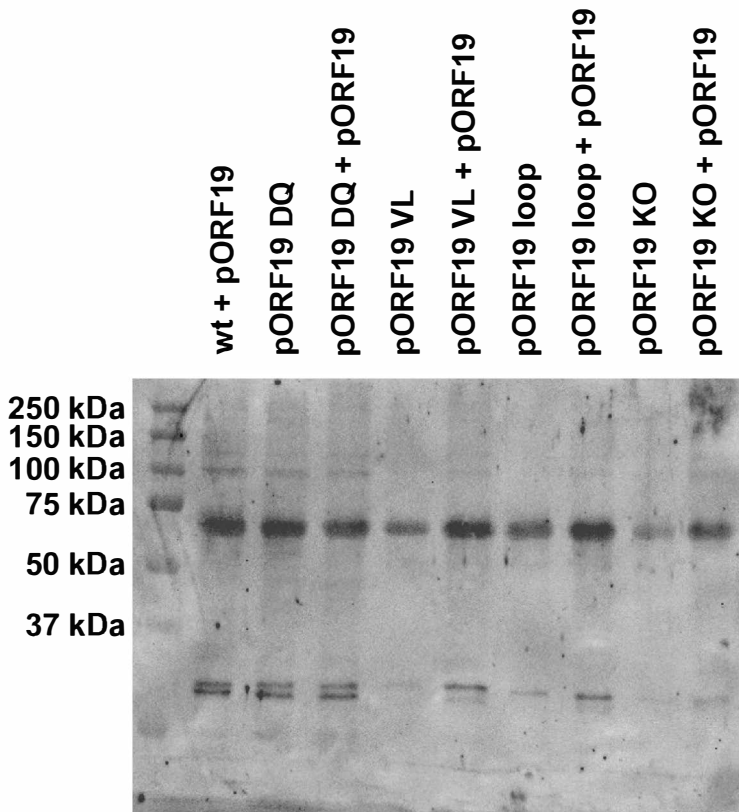

Supplement: pbio.3001423.s016.pdf [file pbio.3001423.s016.pdf]
